# Supplementary material
Source: HighWire-hosted journal article supplement (https://rapm.bmj.com/content/rapm-2021-103368)
Supplement: inline-supplementary-material-5 [file inline-supplementary-material-5.pdf]

## Supplemental File

### 1 SCANNING TASKS, BLOCK ALLOCATION & STRUCTURES CONSIDERED

#### 1.1 SCANNING TASKS PERFORMED

Scanning tasks were performed as per the table below (the order of scanning with/without ScanNav Anatomy PNB was alternated between participants).

| BMI       | Block               | Task                | Side | ScanNav Anatomy PNB |  |
|-----------|---------------------|---------------------|------|---------------------|--|
| Subject 1 | Block 1             | Expert              | L    | Yes                 |  |
|           |                     |                     | R    |                     |  |
|           |                     | Expert + Non-expert | L    | Yes                 |  |
|           |                     |                     | R    |                     |  |
|           | Block questionnaire |                     |      |                     |  |
|           | Block 2             | Expert              | L    | Yes                 |  |
|           |                     |                     | R    |                     |  |
|           |                     | Expert + Non-expert | L    | Yes                 |  |
|           |                     |                     | R    |                     |  |
|           | Block questionnaire |                     |      |                     |  |
| Subject 2 | Block 1             | Expert              | L    | Yes                 |  |
|           |                     |                     | R    |                     |  |
|           |                     | Expert + Non-expert | L    | Yes                 |  |
|           |                     |                     | R    |                     |  |
|           | Block questionnaire |                     |      |                     |  |
|           | Block 2             | Expert              | L    | Yes                 |  |
|           |                     |                     | R    |                     |  |
|           |                     | Expert + Non-expert | L    | Yes                 |  |
|           |                     |                     | R    |                     |  |
|           | Block questionnaire |                     |      |                     |  |

## 1.2 BLOCK ALLOCATION

ScanNav Anatomy PNB supports anatomical structure identification for nine UGRA blocks. Study participant pairs (expert + non-expert) were assigned two blocks each in a pseudo-random manner, to provide coverage of supported blocks from the upper limb, trunk and lower limb.

| Participant ID | Block 1                            | Block 2                                         |
|----------------|------------------------------------|-------------------------------------------------|
| E1/N1          | Rectus sheath plane                | Popliteal level sciatic nerve                   |
| E2/N2          | Erector spinae plane               | Sub-sartorial femoral triangle / Adductor canal |
| E3/N3          | Superior trunk of brachial plexus  | Sub-sartorial femoral triangle / Adductor canal |
| E4/N4          | Rectus sheath plane                | Sub-sartorial femoral triangle / Adductor canal |
| E5/N5          | Popliteal level sciatic nerve      | Axillary level brachial plexus                  |
| E6/N6          | Suprainguinal fascia iliaca plane  | Popliteal level sciatic nerve                   |
| E7/N6          | Popliteal level sciatic nerve      | Supraclavicular level brachial plexus           |
| E8/N8          | Interscalene level brachial plexus | Rectus sheath plane                             |
| E9/N9          | Erector spinae plane               | Axillary level brachial plexus                  |
| E10/N10        | Popliteal level sciatic nerve      | Suprainguinal fascia iliaca plane               |
| E11/N11        | Suprainguinal fascia iliaca plane  | Sub-sartorial femoral triangle / Adductor canal |
| E12/N12        | Erector spinae plane               | Popliteal level sciatic nerve                   |
| E13/N13        | Suprainguinal fascia iliaca plane  | Sub-sartorial femoral triangle / Adductor canal |
| E14/N14        | Interscalene level brachial plexus | Popliteal level sciatic nerve                   |
| E15/N15        | Superior trunk of brachial plexus  | Sub-sartorial femoral triangle / Adductor canal |

A summary of ultrasound scans performed (by participant, with/without ScanNav Anatomy PNB, subject BMI and ultrasound machine) us shown below

| Number of Ultrasound scans         |            | Low BMI<br>( $<30\text{kg/m}^2$ ) | High BMI<br>( $\geq 30\text{kg/m}^2$ ) | SonoSite PX | SonoSite X-Porte |
|------------------------------------|------------|-----------------------------------|----------------------------------------|-------------|------------------|
| <b>with</b> ScanNav Anatomy PNB    | 120        | 60                                | 60                                     | 60          | 60               |
| captured by experts                | 60         | 30                                | 30                                     | 30          | 30               |
| captured by trainees               | 60         | 30                                | 30                                     | 30          | 30               |
|                                    |            |                                   |                                        |             |                  |
| <b>without</b> ScanNav Anatomy PNB | 120        | 60                                | 60                                     | 60          | 60               |
| captured by experts                | 60         | 30                                | 30                                     | 30          | 30               |
| captured by trainees               | 60         | 30                                | 30                                     | 30          | 30               |
|                                    |            |                                   |                                        |             |                  |
| <b>Total</b>                       | <b>240</b> | <b>120</b>                        | <b>120</b>                             | <b>120</b>  | <b>120</b>       |

### 1.3 SAFETY CRITICAL STRUCTURES

Following structures were considered as safety critical structures for each block:

| Item | Anatomical Region                                                                    | Safety critical anatomical structures                                                                                                                           |
|------|--------------------------------------------------------------------------------------|-----------------------------------------------------------------------------------------------------------------------------------------------------------------|
| 1)   | Brachial plexus in the neck:<br>-Interscalene<br>-Superior trunk<br>-Supraclavicular | <ul style="list-style-type: none"> <li>• Brachial plexus nerves (roots, trunks, divisions)</li> <li>• Subclavian or carotid artery</li> <li>• Pleura</li> </ul> |
| 2)   | Axillary level brachial plexus                                                       | <ul style="list-style-type: none"> <li>• Radial, ulnar, median, and musculocutaneous nerves</li> <li>• Axillary artery</li> </ul>                               |
| 3)   | Erector spinae plane                                                                 | <ul style="list-style-type: none"> <li>• Pleura</li> <li>• Transverse processes</li> </ul>                                                                      |
| 4)   | Rectus sheath plane                                                                  | <ul style="list-style-type: none"> <li>• Peritoneum</li> <li>• Fascial plane</li> </ul>                                                                         |
| 5)   | Suprainguinal fascia iliaca                                                          | <ul style="list-style-type: none"> <li>• Deep circumflex iliac artery</li> <li>• Fascial plane</li> </ul>                                                       |
| 6)   | Sub-sartorial femoral triangle / Adductor canal                                      | <ul style="list-style-type: none"> <li>• Femoral artery</li> <li>• Saphenous nerve</li> </ul>                                                                   |
| 7)   | Popliteal level sciatic nerve                                                        | <ul style="list-style-type: none"> <li>• Sciatic nerve (or peroneal/fibular and tibial nerve components)</li> <li>• Popliteal artery</li> </ul>                 |





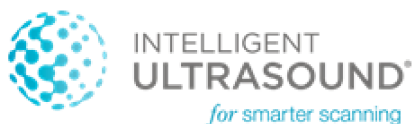

Expert questionnaire results are presented below:

| Participant ID | Block | Model ID | BMI  | BP-1 | BP-2 | BP-3 | BP-4 | BP-5 | BP-6 | BP-7 | BP-8 |
|----------------|-------|----------|------|------|------|------|------|------|------|------|------|
| E1             | Pop   | 2        | High | 10   | 10   | B    | B    | B    | B    | 5    | 3    |
| E1             | Pop   | 3        | Low  | 10   | 10   | B    | B    | C    | C    | 6    | 4    |
| E1             | RS    | 2        | High | 10   | 10   | B    | B    | B    | C    | 10   | 4    |
| E1             | RS    | 3        | Low  | 10   | 10   | B    | B    | B    | C    | 10   | 10   |
| E2             | Add   | 2        | High | 10   | 10   | B    | C    | C    | B    | 2    | 2    |
| E2             | Add   | 3        | Low  | 10   | 10   | B    | B    | B    | B    | 2    | 2    |
| E2             | ESP   | 2        | High | 10   | 10   | B    | A    | A    | B    | 2    | 2    |
| E2             | ESP   | 3        | Low  | 10   | 10   | B    | B    | B    | B    | 1    | 1    |
| E3             | Add   | 2        | High | 10   | 10   | B    | B    | B    | B    | 10   | 10   |
| E3             | Add   | 3        | Low  | 10   | 10   | B    | B    | B    | B    | 10   | 10   |
| E3             | ST    | 2        | High | 8    | 8    | A    | A    | A    | B    | 3    | 4    |
| E3             | ST    | 3        | Low  | 5    | 5    | B    | B    | B    | B    | 5    | 5    |
| E4             | Add   | 2        | High | 10   | 10   | B    | B    | B    | B    | 8    | 8    |
| E4             | Add   | 3        | Low  | 10   | 10   | B    | B    | B    | B    | 9    | 9    |
| E4             | RS    | 2        | High | 10   | 10   | B    | B    | B    | B    | 8    | 8    |
| E4             | RS    | 3        | Low  | 10   | 10   | B    | B    | B    | B    | 9    | 9    |
| E5             | Ax    | 2        | High | 10   | 8    | C    | B    | C    | B    | 8    | 7    |
| E5             | Ax    | 3        | Low  | 10   | 10   | C    | B    | C    | C    | 9    | 8    |
| E5             | Pop   | 2        | High | 10   | 8    | C    | B    | B    | C    | 9    | 8    |
| E5             | Pop   | 3        | Low  | 10   | 10   | A    | A    | A    | C    | 9    | 9    |
| E6             | Pop   | 2        | High | 10   | 10   | B    | B    | B    | C    | 10   | 10   |
| E6             | Pop   | 3        | Low  | 9    | 9    | B    | B    | B    | B    | 8    | 6    |
| E6             | SFIC  | 2        | High | 10   | 10   | B    | A    | A    | B    | 8    | 8    |
| E6             | SFIC  | 3        | Low  | 7    | 10   | B    | B    | B    | B    | 4    | 7    |
| E7             | Pop   | 2        | High | 10   | 10   | B    | A    | A    | B    | 8    | 10   |
| E7             | Pop   | 3        | Low  | 10   | 10   | B    | B    | B    | B    | 9    | 10   |
| E7             | SC    | 2        | High | 10   | 10   | B    | A    | B    | B    | 10   | 10   |
| E7             | SC    | 3        | Low  | 10   | 10   | B    | A    | A    | C    | 8    | 9    |
| E8             | IS    | 2        | High | 8    | 8    | B    | B    | B    | C    | 2    | 2    |
| E8             | IS    | 3        | Low  | 7    | 7    | B    | B    | A    | B    | 2    | 4    |
| E8             | RS    | 2        | High | 6    | 6    | B    | A    | B    | A    | 2    | 4    |
| E8             | RS    | 3        | Low  | 7    | 8    | A    | A    | A    | C    | 4    | 4    |
| E9             | Ax    | 3        | Low  | 9    | 9    | B    | A    | A    | A    | 7    | 9    |
| E9             | Ax    | 2        | High | 9    | 9    | B    | A    | A    | B    | 6    | 8    |
| E9             | ESP   | 2        | High | 3    | 4    | B    | B    | B    | B    | 3    | 3    |
| E9             | ESP   | 3        | Low  | 9    | 10   | A    | A    | A    | A    | 8    | 9    |
| E10            | Pop   | 2        | High | 9    | 9    | B    | B    | B    | B    | 9    | 9    |
| E10            | Pop   | 3        | Low  | 9    | 9    | B    | B    | A    | B    | 8    | 8    |
| E10            | SFIC  | 2        | High | 7    | 8    | A    | A    | A    | B    | 7    | 8    |
| E10            | SFIC  | 3        | Low  | 8    | 9    | A    | A    | B    | A    | 8    | 9    |

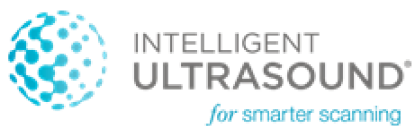

| Participant ID | Block | Model ID | BMI  | BP-1 | BP-2 | BP-3 | BP-4 | BP-5 | BP-6 | BP-7 | BP-8 |
|----------------|-------|----------|------|------|------|------|------|------|------|------|------|
| E11            | Add   | 2        | High | 7    | 8    | A    | A    | B    | A    | 6    | 8    |
| E11            | Add   | 3        | Low  | 6    | 8    | A    | A    | B    | A    | 6    | 8    |
| E11            | SFIC  | 2        | High | 7    | 8    | A    | A    | A    | B    | 6    | 8    |
| E11            | SFIC  | 3        | Low  | 7    | 8    | A    | A    | A    | A    | 6    | 8    |
| E13            | Add   | 2        | High | 10   | 10   | B    | A    | A    | A    | 7    | 8    |
| E13            | Add   | 3        | Low  | 10   | 10   | B    | B    | B    | B    | 7    | 7    |
| E12            | ESP   | 2        | High | 6    | 7    | A    | A    | A    | A    | 5    | 6    |
| E12            | ESP   | 3        | Low  | 7    | 9    | A    | A    | A    | A    | 6    | 8    |
| E12            | Pop   | 2        | High | 9    | 10   | A    | A    | A    | A    | 8    | 9    |
| E12            | Pop   | 3        | Low  | 9    | 10   | A    | A    | A    | A    | 9    | 10   |
| E13            | SFIC  | 2        | High | 8    | 8    | B    | A    | A    | A    | 8    | 8    |
| E13            | SFIC  | 3        | Low  | 10   | 10   | B    | B    | B    | B    | 7    | 7    |
| E14            | IS    | 2        | High | 10   | 10   | B    | A    | A    | B    | 6    | 8    |
| E14            | IS    | 3        | Low  | 10   | 10   | B    | B    | A    | A    | 7    | 8    |
| E14            | Pop   | 2        | High | 10   | 10   | B    | A    | A    | A    | 7    | 8    |
| E14            | Pop   | 3        | Low  | 10   | 10   | B    | B    | A    | A    | 7    | 8    |
| E15            | Add   | 2        | High | 10   | 10   | B    | A    | A    | B    | 1    | 4    |
| E15            | Add   | 3        | Low  | 10   | 10   | B    | A    | B    | B    | 2    | 4    |
| E15            | ST    | 2        | High | 10   | 10   | A    | A    | A    | B    | 1    | 2    |
| E15            | ST    | 3        | Low  | 10   | 10   | B    | A    | B    | B    | 1    | 2    |

| Benefit                                                                                                                                                              | Study Questions                                                                                                                                                                                                                                                                         |                                                                                                                                                                                 | Results                                                                                       |                                                                    |
|----------------------------------------------------------------------------------------------------------------------------------------------------------------------|-----------------------------------------------------------------------------------------------------------------------------------------------------------------------------------------------------------------------------------------------------------------------------------------|---------------------------------------------------------------------------------------------------------------------------------------------------------------------------------|-----------------------------------------------------------------------------------------------|--------------------------------------------------------------------|
|                                                                                                                                                                      |                                                                                                                                                                                                                                                                                         |                                                                                                                                                                                 | Positive or Neutral Response                                                                  | Negative response                                                  |
| Improving in operator confidence to achieve optimum view                                                                                                             | BP-1 On a scale of 0 to 10 for this block, how would you rate your scanning confidence on this subject <b>WITHOUT</b> ScanNav Anatomy PNB<br><br>BP-2 On a scale of 0 to 10 for this block, how would you rate your scanning confidence on this subject <b>WITH</b> ScanNav Anatomy PNB | 0-10 scale, 0 being no confidence, 10 being totally confident.<br><br>Change in confidence is calculated as a difference between two confidence scores with and without device. | In 97% (n=58) cases device either increased or did not change participant confidence levels   | In 3% (n=2) cases device decreased participant confidence levels   |
| identification of anatomical structures<br><br>obtaining the correct ultrasound view of the anatomy prior to needle insertion                                        | BP-3 When identifying the relevant anatomical structures for this block on ultrasound, ScanNav Anatomy PNB                                                                                                                                                                              | A. Assisted/helped you<br>B. Made no difference<br>C. Hindered you/made it harder                                                                                               | In 95% (n=57) cases device either assisted or made no difference to user                      | In 5% (n=3) cases device hindered the user                         |
| supervision and training in anatomical structure identification for UGRA scanning                                                                                    | BP-4 When teaching the scanning for this block, ScanNav Anatomy PNB made it                                                                                                                                                                                                             | A. Easier to teach<br>B. No difference<br>C. Harder to teach                                                                                                                    | In 98% (n=59) cases device made it either easier or made no difference in teaching blocks     | In 2% (n=1) cases device hindered teaching                         |
| supervision and training in anatomical structure identification for UGRA scanning                                                                                    | BP-5 When supervising the trainee on this block, ScanNav Anatomy PNB                                                                                                                                                                                                                    | A. Was beneficial to you<br>B. Made no difference<br>C. Was detrimental to/hindered your teaching                                                                               | In 93% (n=56) cases device was beneficial or made no difference when supervising trainee      | In 7% (n=4) cases device did not assist when supervising trainee   |
| supervision and training in anatomical structure identification for UGRA scanning                                                                                    | BP-6 ScanNav Anatomy PNB reduced the frequency of interventions you needed to supervise the trainee effectively                                                                                                                                                                         | A. Yes<br>B. No difference<br>C. No                                                                                                                                             | In 83% (n=50) cases device either reduced or made no difference in frequency of interventions | In 17% (n=10) device did not reduce the frequency of interventions |
| Improving in operator confidence to achieve optimum view (Trainee scanning)<br><br>supervision and training in anatomical structure identification for UGRA scanning | BP-7 On a scale of 0 to 10, how confident were you in the trainee's scanning ability <b>WITHOUT</b> ScanNav Anatomy PNB<br><br>BP-8 On a scale of 0 to 10, how confident were you in the trainee's scanning ability <b>WITH</b> ScanNav Anatomy PNB                                     | 0-10 scale, 0 being no confidence, 10 being totally confident.<br><br>Change in confidence is calculated as a difference between two confidence scores with and without device. | In 88% (n=53) cases device either increased or did not change confidence levels in trainees   | In 12% (n=7) cases device decreased confidence levels in trainees  |

#### 1.4.1 Change in expert confidence (Question BP-1 and BP-2)

Mean confidence in expert scanning without using ScanNav Anatomy PNB was 8.93/10 compared to 9.17/10 when using ScanNav Anatomy PNB.

23% (n=14) of responses to the User Confidence question indicated that block scanning confidence increased when scanning with ScanNav Anatomy PNB. Most participants reported a 1-point improvement, with 1 participant reporting a 3-point improvement (from 7 to 10) when scanning with Anatomy PNB for the SIFIB block. The other 73% (n=44) of responses reported no difference in confidence. In over half of the responses (58%, n=35), participants identified their scanning confidence without device as "10" (the maximum) for the assigned block, making further improvement impossible.

3% (n=2) of responses reported decrease in confidence by 2 points. These responses came from the same participant (E5) for Axillary and Popliteal block, reporting a 2-point decrease in confidence from 10 to 8 points on a high BMI model.

#### 1.4.2 Identification of structures (Question BP-3)

25% (n=15) of responses indicated that the device assisted or helped the participant when identifying the relevant anatomical structures for the block, while 70% (n=42) reported that device made no difference when identifying structures.

5% (n=3) of responses reported that the device hindered or made it harder to identify anatomical structures.

#### 1.4.3 Teaching scanning for UGRA (Question BP-4)

50% (n=30) of responses indicated that the device made it easier to teach scanning for the given block, while 48% (n=29) reported that the device assistance made no difference.

1 participant (E2) reported that they found it harder to teach. This was in high BMI model (adductor block). Participant E2 reported that the device made no difference in teaching for the adductor or ESP blocks in the low BMI model, but that it did assist in teaching for the ESP in the high BMI model.

#### 1.4.4 Supervision of UGRA procedures (Question BP-5)

45% (n=27) of responses indicated that when supervising the trainee, the device was beneficial to the participant, while 48% (n=29) reported that the device assistance made no difference.

7% (n=4) of responses indicated that the device was either detrimental or hindered their supervision of trainee for the given block. One response was obtained from participant E1 on the low BMI model (popliteal block), and participant E2 on the high BMI model (adductor block). The other 2 negative responses were obtained from the same participant E5, on both low and high BMI models (axillary blocks).

#### 1.4.5 Frequency of interventions by supervisor (Question BP-6)

27% (n=16) of responses indicated that device reduced the frequency of interventions when supervising the trainee. 57% (n=34) reported that the device made no difference, and 17% (n=10) reported that ScanNav Anatomy PNB did not reduce the frequency of interventions.

Out of 10 responses that reported the device did not reduce the frequency of interventions, both participants E1 and E5 responded in this manner 3 times each. Remaining responses were from E6, E7 and twice from E8. Four of responses were for each popliteal and rectus blocks.



#### 1.4.6 Change of expert confidence in (when supervising) trainee (Question BP-7 and BP-8)

The mean score of expert confidence in trainee scanning was 6.32/10 without the use of ScanNav Anatomy PNB and 6.82 with.

48% (n=29) of responses indicated that their confidence in the trainee increased when the trainee was scanning with the device. Most of these participants reported a 1 to 2-point improvement in confidence, while 2 of the 29 reported a 3-point improvement (adductor and SFIC blocks). 40% (n=24) of participant responses indicated that device did not affect trainee confidence.

12% (n=7) of responses indicated a decrease in trainee confidence. Participant E1 made 3 observations that their trainee's confidence was decreased (rectus sheath and popliteal blocks). Participant E5 made 3 observations that their trainee's confidence was decreased (axillary and popliteal blocks). Participant E6 made one observation that their trainee's confidence reduced when using the device (popliteal block). In 6 of these instances, the decrease in confidence was 1-2 points. In one instance, participant E1 reported a 6-point reduction in trainee confidence (from 10 to 4) when scanning for the rectus sheath block on the high BMI model.

#### 1.4.7 Analysis of positive responses to questionnaire

A total of 360 expert responses to the Benefit Questionnaire were analysed. 36.4% (131/360) of responses were positive. 92.5% (333/360) of responses were either positive or neutral.

| Participant ID | Number of positive responses |           |           |           |                        |                    | Total      |
|----------------|------------------------------|-----------|-----------|-----------|------------------------|--------------------|------------|
|                | BP-3                         | BP-4      | BP-5      | BP-6      | Participant confidence | Trainee confidence |            |
| E1             | 0                            | 0         | 0         | 0         | 0                      | 0                  | 0          |
| E2             | 0                            | 1         | 1         | 0         | 0                      | 0                  | 2          |
| E3             | 1                            | 1         | 1         | 0         | 0                      | 1                  | 4          |
| E4             | 0                            | 0         | 0         | 0         | 0                      | 0                  | 0          |
| E5             | 1                            | 1         | 1         | 0         | 0                      | 0                  | 3          |
| E6             | 0                            | 1         | 1         | 0         | 1                      | 1                  | 4          |
| E7             | 0                            | 3         | 2         | 0         | 0                      | 3                  | 8          |
| E8             | 1                            | 2         | 2         | 1         | 1                      | 2                  | 9          |
| E9             | 1                            | 3         | 3         | 2         | 2                      | 3                  | 14         |
| E10            | 2                            | 2         | 2         | 1         | 2                      | 2                  | 11         |
| E11            | 4                            | 4         | 2         | 3         | 4                      | 4                  | 21         |
| E12            | 4                            | 4         | 4         | 4         | 4                      | 4                  | 24         |
| E13            | 0                            | 2         | 2         | 2         | 0                      | 1                  | 7          |
| E14            | 0                            | 2         | 4         | 3         | 0                      | 4                  | 13         |
| E15            | 1                            | 4         | 2         | 0         | 0                      | 4                  | 11         |
| <b>Total</b>   | <b>15</b>                    | <b>30</b> | <b>27</b> | <b>16</b> | <b>14</b>              | <b>29</b>          | <b>131</b> |

#### Experts



The majority of expert participants (13/15) contributed to the positive feedback about the device. Participant E12 provided maximum number of possible positive responses (24/24), while on average each participant providing positive feedback provided approximately 10 responses out of 24 possible opportunities (on average 40%).

### **BMI**

Of the 131 positive responses (out of 360), 48% (63/131) positive responses were related to scans taken on a high BMI model and 52% (68/131) responses were related to scans taken on a low BMI model.

### **Block**

Most positive responses were related to the Axillary and Interscalene blocks (approximately 20% of positive responses each), followed by the Popliteal (16%, 21/131 positive responses) and Adductor blocks (14.5%, 19/131 positive responses).

| BLOCK           | COUNT OF POSITIVE RESPONSES | PERCENT |
|-----------------|-----------------------------|---------|
| INTERSCALENE    | 28                          | 21.4%   |
| AXILLARY        | 27                          | 20.6%   |
| POPLITEAL       | 21                          | 16.0%   |
| ADDUCTOR        | 19                          | 14.5%   |
| SUPRACLAVICULAR | 10                          | 7.6%    |
| RECTUS SHEATH   | 8                           | 6.1%    |
| ESP             | 7                           | 5.3%    |
| SFIC            | 7                           | 5.3%    |
| SUPERIOR TRUNK  | 4                           | 3.1%    |
| <b>TOTAL</b>    | <b>131</b>                  |         |

#### 1.4.8 Analysis of negative responses to benefit questionnaire

A total of 360 participant responses to Benefit Questionnaire were analysed. 7.5% (27/360 responses) were negative.

| Participant ID | Number of negative responses |      |      |      |                        |                    | Total |
|----------------|------------------------------|------|------|------|------------------------|--------------------|-------|
|                | BP-3                         | BP-4 | BP-5 | BP-6 | Participant confidence | Trainee confidence |       |
| E1             | 0                            | 0    | 1    | 3    | 0                      | 3                  | 7     |
| E2             | 0                            | 1    | 1    | 0    | 0                      | 0                  | 2     |
| E3             | 0                            | 0    | 0    | 0    | 0                      | 0                  | 0     |
| E4             | 0                            | 0    | 0    | 0    | 0                      | 0                  | 0     |
| E5             | 3                            | 0    | 2    | 3    | 3                      | 2                  | 13    |
| E6             | 0                            | 0    | 0    | 1    | 0                      | 1                  | 2     |
| E7             | 0                            | 0    | 0    | 1    | 0                      | 0                  | 1     |
| E8             | 0                            | 0    | 0    | 2    | 0                      | 0                  | 2     |
| E9             | 0                            | 0    | 0    | 0    | 0                      | 0                  | 0     |
| E10            | 0                            | 0    | 0    | 0    | 0                      | 0                  | 0     |
| E11            | 0                            | 0    | 0    | 0    | 0                      | 0                  | 0     |

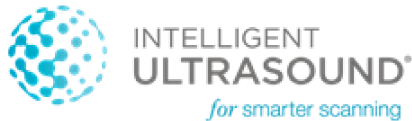

|              |          |          |          |           |          |          |           |
|--------------|----------|----------|----------|-----------|----------|----------|-----------|
| E12          | 0        | 0        | 0        | 0         | 0        | 0        | 0         |
| E13          | 0        | 0        | 0        | 0         | 0        | 0        | 0         |
| E14          | 0        | 0        | 0        | 0         | 0        | 0        | 0         |
| E15          | 0        | 0        | 0        | 0         | 0        | 0        | 0         |
| <b>Total</b> | <b>3</b> | <b>1</b> | <b>4</b> | <b>10</b> | <b>3</b> | <b>6</b> | <b>27</b> |

### **Experts**

Six experts (6/15) contributed to the negative feedback. Almost half (48%, n=13) of negative responses were provided by single participant E5, while approximately quarter (26%, n=7) of negative responses were provided by participant E1. The remaining quarter (26% n=7) of issues were reported by another 4 different participants.

### **BMI**

16 negative responses were related to scans taken on a High BMI model and 11 responses were related to scan taken on a Low BMI model.

### **Block**

41% (n=11) of negative responses were related to the popliteal block and 30% (n=8) responses were related to the axillary block. The remaining 8 negative responses were related to either rectus sheath, adductor, interscalene or supraclavicular blocks. The popliteal block was assigned to both E1 and E5 participants who contributed to most of the negative feedback collected. All the negative feedback regarding the axillary block was received from participant E5.

| <b>BLOCK</b>           | <b>COUNT OF NEGATIVE RESPONSES</b> | <b>PERCENT</b> |
|------------------------|------------------------------------|----------------|
| <b>POPLITEAL</b>       | 11                                 | 40.7           |
| <b>AXILLARY</b>        | 8                                  | 29.6           |
| <b>RECTUS SHEATH</b>   | 4                                  | 14.8           |
| <b>ADDUCTOR</b>        | 2                                  | 7.4            |
| <b>INTERSCALENE</b>    | 1                                  | 3.7            |
| <b>SUPRACLAVICULAR</b> | 1                                  | 3.7            |





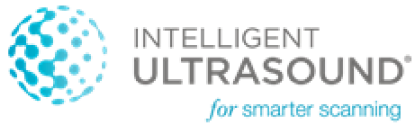

| Participant ID | Block | Model ID | BMI  | BP-9  | BP-10 | BP-11 | BP-12 | BP-13 | BP-14 | BP-15 | BP-16 |
|----------------|-------|----------|------|-------|-------|-------|-------|-------|-------|-------|-------|
| T1             | Pop   | 2        | High | 0     | 5     | 5     | B     | B     | B     | B     | B     |
| T1             | Pop   | 3        | Low  | 10-20 | 5     | 5     | A     | B     | B     | B     | B     |
| T1             | RS    | 2        | High | 0     | 1     | 4     | A     | A     | A     | A     | B     |
| T1             | RS    | 3        | Low  | 0     | 5     | 5     | A     | B     | A     | A     | B     |
| T2             | Add   | 2        | High | 10    | 7     | 6     | A     | C     | A     | B     | A     |
| T2             | Add   | 3        | Low  | 10    | 7     | 7     | A     | B     | B     | A     | B     |
| T2             | Esp   | 2        | High | 0     | 7     | 9     | A     | A     | B     | A     | A     |
| T2             | Esp   | 3        | Low  | 0     | 6     | 6     | B     | A     | B     | A     | B     |
| T3             | Add   | 2        | High | 2     | 3     | 2     | C     | B     | B     | B     | B     |
| T3             | Add   | 3        | Low  | 2     | 4     | 3     | C     | B     | C     | B     | B     |
| T3             | ST    | 2        | High | 0     | 2     | 2     | B     | B     | B     | B     | B     |
| T3             | ST    | 3        | Low  | 2     | 2     | 2     | B     | B     | B     | B     | B     |
| T4             | Add   | 2        | High | 50    | 10    | 10    | B     | B     | A     | A     | B     |
| T4             | Add   | 3        | Low  | 50    | 10    | 10    | B     | B     | A     | B     | B     |
| T4             | RS    | 2        | High | <10   | 10    | 10    | B     | B     | B     | B     | B     |
| T4             | RS    | 3        | Low  | <10   | 9     | 10    | B     | B     | A     | A     | B     |
| T5             | AX    | 2        | High | 5     | 6     | 6     | B     | B     | A     | A     | B     |
| T5             | AX    | 3        | Low  | 5     | 6     | 6     | B     | B     | A     | A     | B     |
| T5             | Pop   | 2        | High | 20    | 7     | 7     | B     | B     | A     | B     | B     |
| T5             | Pop   | 3        | Low  | 20    | 6     | 8     | A     | A     | A     | A     | C     |
| T6             | Pop   | 2        | High | >30   | 10    | 10    | B     | B     | B     | B     | B     |
| T6             | Pop   | 3        | Low  | >30   | 8     | 8     | B     | B     | B     | B     | B     |
| T6             | SFIC  | 2        | High | 0     | 3     | 5     | A     | A     | A     | A     | B     |
| T6             | SFIC  | 3        | Low  | 0     | 1     | 2     | B     | B     | B     | B     | B     |
| T7             | Pop   | 2        | High | 0     | 6     | 7     | A     | B     | A     | A     | B     |
| T7             | Pop   | 3        | Low  | 1     | 6     | 7     | A     | B     | A     | A     | B     |
| T7             | SC    | 2        | High | 0     | 6     | 7     | A     | A     | A     | A     | B     |
| T7             | SC    | 3        | Low  | 0     | 6     | 7     | A     | B     | A     | A     | B     |
| T8             | IS    | 2        | High | 0     | 3     | 7     | B     | A     | A     | A     | B     |
| T8             | IS    | 3        | Low  | 0     | 4     | 8     | A     | A     | A     | A     | A     |
| T8             | RS    | 2        | High | 0     | 8     | 9     | B     | B     | A     | A     | A     |
| T8             | RS    | 3        | Low  | 0     | 7     | 9     | A     | A     | A     | A     | A     |
| T9             | Ax    | 2        | High | 5     | 7     | 8     | A     | A     | A     | A     | B     |
| T9             | AX    | 3        | Low  | 5     | 7     | 8     | A     | A     | A     | A     | B     |
| T9             | Esp   | 2        | High | 0     | 2     | 3     | A     | A     | A     | A     | B     |
| T9             | Esp   | 3        | Low  | 0     | 5     | 8     | A     | A     | A     | A     | B     |
| T10            | Pop   | 2        | High | 20-30 | 7     | 7     | B     | B     | B     | B     | B     |
| T10            | Pop   | 3        | Low  | 20-30 | 9     | 9     | A     | A     | B     | B     | B     |
| T10            | SFIC  | 2        | High | 3-4   | 5     | 6     | A     | A     | A     | A     | B     |
| T10            | SFIC  | 3        | Low  | 3-4   | 7     | 8     | A     | A     | A     | A     | B     |
| T11            | Add   | 2        | High | 50    | 10    | 10    | B     | B     | B     | A     | A     |



| Participant ID | Block | Model ID | BMI  | BP-9 | BP-10 | BP-11 | BP-12 | BP-13 | BP-14 | BP-15 | BP-16 |
|----------------|-------|----------|------|------|-------|-------|-------|-------|-------|-------|-------|
| T11            | Add   | 3        | Low  | 50   | 10    | 10    | B     | B     | B     | B     | B     |
| T11            | SFIC  | 2        | High | 5    | 8     | 9     | A     | A     | A     | A     | A     |
| T11            | SFIC  | 3        | Low  | 5    | 10    | 10    | B     | B     | A     | A     | A     |
| T12            | Esp   | 2        | High | 2    | 6     | 5     | B     | B     | B     | B     | B     |
| T12            | Esp   | 3        | Low  | 3    | 9     | 9     | B     | B     | B     | B     | B     |
| T12            | Pop   | 2        | High | 15   | 8     | 8     | A     | A     | B     | A     | B     |
| T12            | Pop   | 3        | Low  | 15   | 9     | 9     | B     | B     | B     | B     | B     |
| T13            | Add   | 2        | High | 2    | 4     | 6     | A     | B     | A     | A     | B     |
| T13            | Add   | 3        | Low  | 2    | 5     | 6     | A     | A     | A     | A     | B     |
| T13            | SFIC  | 2        | High | 0    | 2     | 3     | B     | B     | B     | B     | B     |
| T13            | SFIC  | 3        | Low  | 0    | 3     | 4     | B     | B     | B     | B     | B     |
| T14            | IS    | 2        | High | 10   | 5     | 7     | A     | B     | A     | A     | B     |
| T14            | IS    | 3        | Low  | 10   | 7     | 9     | A     | A     | A     | A     | B     |
| T14            | Pop   | 2        | High | 15   | 8     | 9     | A     | B     | A     | A     | B     |
| T14            | Pop   | 3        | Low  | 15   | 8     | 9     | B     | B     | A     | B     | B     |
| T15            | Add   | 2        | High | 0    | 5     | 7     | A     | A     | A     | A     | B     |
| T15            | Add   | 3        | Low  | 0    | 8     | 8     | B     | B     | A     | B     | B     |
| T15            | ST    | 2        | High | 0    | 5     | 5     | A     | B     | A     | A     | B     |
| T15            | ST    | 3        | Low  | 0    | 5     | 6     | A     | A     | B     | A     | B     |

| Benefit                                                                                                                   | Study Questions                                                                                                                                                                                                                                                                           |                                                                                                                                                                                 | Results                                                                                              |                                                                   |
|---------------------------------------------------------------------------------------------------------------------------|-------------------------------------------------------------------------------------------------------------------------------------------------------------------------------------------------------------------------------------------------------------------------------------------|---------------------------------------------------------------------------------------------------------------------------------------------------------------------------------|------------------------------------------------------------------------------------------------------|-------------------------------------------------------------------|
|                                                                                                                           |                                                                                                                                                                                                                                                                                           |                                                                                                                                                                                 | Positive or Neutral Response                                                                         | Negative response                                                 |
| Improving in operator confidence to achieve optimum view                                                                  | BP-10 On a scale of 0 to 10 for this block, how would you rate your scanning confidence on this subject <b>WITHOUT</b> ScanNav Anatomy PNB<br><br>BP-11 On a scale of 0 to 10 for this block, how would you rate your scanning confidence on this subject <b>WITH</b> ScanNav Anatomy PNB | 0-10 scale, 0 being no confidence, 10 being totally confident.<br><br>Change in confidence is calculated as a difference between two confidence scores with and without device. | In 93% (n=56) cases device either increased or did not change trainee confidence levels              | In 7% (n=4) cases device decreased trainee confidence levels      |
| Identification of anatomical structures<br>Obtaining the correct ultrasound view of the anatomy prior to needle insertion | BP-12 When identifying the relevant anatomical structures for this block on ultrasound, ScanNav Anatomy PNB:                                                                                                                                                                              | A. Assisted/helped you<br>B. Made no difference<br>C. Hindered you/made it harder                                                                                               | In 97% (n=58) cases device either assisted or made no difference to trainee                          | In 3% (n=2) cases device hindered the trainee                     |
| Obtaining the correct ultrasound view of the anatomy prior to needle insertion                                            | BP-13 When acquiring the correct ultrasound view for this block, did ScanNav Anatomy PNB:                                                                                                                                                                                                 | A. Assisted/helped you<br>B. Made no difference<br>C. Hindered you/made it harder                                                                                               | In 98% (n=59) cases device made it either easier or made no difference in finding the correct view   | In 2% (n=1) cases device hindered finding the correct view        |
| Supervision and training in anatomical structure identification for UGRA scanning                                         | BP-14 When learning scanning for this block, ScanNav Anatomy PNB made it:                                                                                                                                                                                                                 | A. Easier to learn<br>B. No difference<br>C. Harder to learn                                                                                                                    | In 98% (n=59) cases device was beneficial or made no difference when learning how to scan            | In 2% (n=1) cases device made it harder when learning how to scan |
| Supervision and training in anatomical structure identification for UGRA scanning                                         | BP-15 When scanning for this block, ScanNav Anatomy PNB:                                                                                                                                                                                                                                  | A. Was beneficial for/helped your training<br>B. Made no difference to your training<br>C. Was detrimental to/hindered your training                                            | In 100% (n=60) cases device was either beneficial or made no difference in trainees training to scan | In no cases did the device hindered trainees training             |
| Supervision and training in anatomical structure identification for UGRA scanning                                         | BP-16 While using ScanNav Anatomy PNB for this block I required:                                                                                                                                                                                                                          | A. Less support from my supervisor<br>B. The same amount of support from my supervisor<br>C. More support from my supervisor                                                    | In 98% (n=59) cases device either increased or did not change confidence levels in trainees          | In 2% (n=1) cases device decreased confidence levels in trainees  |

Table 1: Summary of benefit questionnaire results (trainees)

### 1.5.1 Trainee prior experience in scanning blocks (Question BP-9)

38% (n=23) of trainee responses indicated that they have never performed their assigned block before. All other trainees who participated in this study have previously performed the assigned block between 1 and 50 times.

### 1.5.2 Change in trainee confidence (Question BP-10 and BP-11)

Mean confidence in trainees scanning without using ScanNav Anatomy PNB was 6.17/10 compared to 6.92/10 when using ScanNav Anatomy PNB.

52% (n=31) of responses indicated that the trainees self-perceived confidence increased when scanning with the device for the block. Most trainees reported a 1-point improvement, whilst 1 trainee reported a 4-point improvement when scanning for interscalene block with the device (on both low and high BMI models). The remaining responses (42%, n=25) reported no difference in confidence.

7% (n=4) of responses reported a decrease in confidence by 1 point. Two of the responses were from trainee T3 scanning an adductor block on both low and high BMI model. The other two responses were recorded from trainees T2 and T12 who scanned ESP and adductor models on the high BMI model.

### 1.5.3 Identification of structures (Question BP-12)

52% (n=31) of responses indicated that the device assisted or helped the trainee when identifying the relevant anatomical structures for the block, while 45% (n=27) reported that device made no difference.

3% (n=2) responses reported that device hindered or made it harder to identify anatomical structures. All such responses were obtained from trainee T3, while scanning low and high BMI model for the adductor block.

### 1.5.4 Finding correct view (Question BP-13)

37% (n=22) of responses indicated that the device assisted the trainee to find the correct ultrasound view for the assigned block, while 62% (n=37) of responses reported that the device assistance made no difference.

1 trainee (T2) reported that they found the device hindered them when finding the correct view, during an adductor block scan on High BMI model.

### 1.5.5 Learning to scan for the block (Question BP-14)

60% (n=36) of trainee responses indicated that the device made it easier to learn how to scan for the given block, while 38% (n=23) reported that the device assistance made no difference.

2% (n=1) responses indicated that the device made it harder to learn how to scan for the given block. This response was obtained from participant T3 for the Adductor block on the low BMI model.

### 1.5.6 Helped training (Question BP-15)

62% (n=37) of trainee responses indicated that device was beneficial or helped their training, while 38% (n=23) reported that the device made no difference.

No participants reported that device was detrimental or hindered their training.

### 1.5.7 Supervisor support (Question BP-16)

A majority of trainees responses (85%, n=51) indicated that they required the same amount of support from their supervisor while using the device. Some trainees (13%, n=8) indicated that they required less



support and one trainee T5 responded that they required more support from their supervisor when scanning the Popliteal block on low BMI model with the device.

#### 1.5.8 Analysis of positive response to Benefit Questionnaire

A total of 360 participant responses to the Benefit Questionnaire were analysed. 45.8% (165/360) of responses were positive. 97.5% (351/360) of responses were either positive or neutral.

| Participant ID | Number of positive responses |           |           |           |          |           | Trainee confidence | Total |
|----------------|------------------------------|-----------|-----------|-----------|----------|-----------|--------------------|-------|
|                | BP-12                        | BP-13     | BP-14     | BP-15     | BP-16    |           |                    |       |
| T1             | 3                            | 1         | 2         | 2         | 0        | 1         | 9                  |       |
| T2             | 3                            | 2         | 1         | 3         | 2        | 1         | 12                 |       |
| T3             | 0                            | 0         | 0         | 0         | 0        | 0         | 0                  |       |
| T4             | 0                            | 0         | 3         | 2         | 0        | 1         | 6                  |       |
| T5             | 1                            | 1         | 4         | 3         | 0        | 1         | 10                 |       |
| T6             | 1                            | 1         | 1         | 1         | 0        | 2         | 6                  |       |
| T7             | 4                            | 1         | 4         | 4         | 0        | 4         | 17                 |       |
| T8             | 2                            | 3         | 4         | 4         | 3        | 4         | 20                 |       |
| T9             | 4                            | 4         | 4         | 4         | 0        | 4         | 20                 |       |
| T10            | 3                            | 3         | 2         | 2         | 0        | 2         | 12                 |       |
| T11            | 1                            | 1         | 2         | 3         | 3        | 1         | 11                 |       |
| T12            | 1                            | 1         | 0         | 1         | 0        | 0         | 3                  |       |
| T13            | 2                            | 1         | 2         | 2         | 0        | 4         | 11                 |       |
| T14            | 3                            | 1         | 4         | 3         | 0        | 4         | 15                 |       |
| T15            | 3                            | 2         | 3         | 3         | 0        | 2         | 13                 |       |
| <b>Total</b>   | <b>31</b>                    | <b>22</b> | <b>36</b> | <b>37</b> | <b>8</b> | <b>31</b> | <b>165</b>         |       |

#### Non-experts

Fourteen (of 15) non-expert participants contributed positive feedback. Participants T8 and T9 provided most positive responses (20/24), while on average each participant who did provide positive feedback provided approximately 12 positive responses out of 24 (on average 50%).

#### BMI

Of the 165 positive responses (out of 360), 53% (87/165) positive responses were related to scans taken on a High BMI model and 47% (78/165) responses were related to scans taken on a Low BMI model.

#### Block

Most positive responses were equally split between SFIC, Popliteal and Adductor blocks (approx. 16% of positive responses each).

| BLOCK     | COUNT OF POSITIVE RESPONSES | PERCENT |
|-----------|-----------------------------|---------|
| SFIC      | 27                          | 16.4%   |
| POPLITEAL | 26                          | 15.8%   |
| ADDUCTOR  | 25                          | 15.2%   |

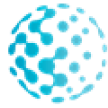

INTELLIGENT  
ULTRASOUND®  
*for smarter scanning*

|                        |            |       |
|------------------------|------------|-------|
| <b>RECTUS SHEATH</b>   | 21         | 12.7% |
| <b>INTERSCALENE</b>    | 19         | 11.5% |
| <b>ESP</b>             | 17         | 10.3% |
| <b>AXILLARY</b>        | 14         | 8.5%  |
| <b>SUPRACLAVICULAR</b> | 9          | 5.5%  |
| <b>SUPERIOR TRUNK</b>  | 7          | 4.2%  |
| <b>TOTAL</b>           | <b>165</b> |       |

#### 1.5.9 Analysis of negative responses to Benefit Questionnaire

A total of 360 trainee responses to the Benefit Questionnaire were analysed. 2.5% (9/360 responses) were negative.

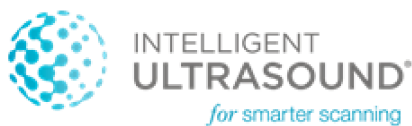

| Trainee ID   | Number of negative responses |          |          |          |          | Trainee confidence | Total    |
|--------------|------------------------------|----------|----------|----------|----------|--------------------|----------|
|              | BP-12                        | BP-13    | BP-14    | BP-15    | BP-16    |                    |          |
| T1           | 0                            | 0        | 0        | 0        | 0        | 0                  | 0        |
| T2           | 0                            | 1        | 0        | 0        | 0        | 1                  | 2        |
| T3           | 2                            | 0        | 1        | 0        | 0        | 2                  | 5        |
| T4           | 0                            | 0        | 0        | 0        | 0        | 0                  | 0        |
| T5           | 0                            | 0        | 0        | 0        | 1        | 0                  | 1        |
| T6           | 0                            | 0        | 0        | 0        | 0        | 0                  | 0        |
| T7           | 0                            | 0        | 0        | 0        | 0        | 0                  | 0        |
| T8           | 0                            | 0        | 0        | 0        | 0        | 0                  | 0        |
| T9           | 0                            | 0        | 0        | 0        | 0        | 0                  | 0        |
| T10          | 0                            | 0        | 0        | 0        | 0        | 0                  | 0        |
| T11          | 0                            | 0        | 0        | 0        | 0        | 0                  | 0        |
| T12          | 0                            | 0        | 0        | 0        | 0        | 1                  | 1        |
| T13          | 0                            | 0        | 0        | 0        | 0        | 0                  | 0        |
| T14          | 0                            | 0        | 0        | 0        | 0        | 0                  | 0        |
| T15          | 0                            | 0        | 0        | 0        | 0        | 0                  | 0        |
| <b>Total</b> | <b>2</b>                     | <b>1</b> | <b>1</b> | <b>0</b> | <b>1</b> | <b>4</b>           | <b>9</b> |

### Non-experts

Four participants (4/15) contributed to the negative feedback. Over half (n=5) negative issues were reported by a single trainee T3, while the remaining issues (n=4) were reported by different 3 trainees.

| TRAINEE ID   | COUNT    | PERCENT     |
|--------------|----------|-------------|
| T3           | 5        | 56%         |
| T2           | 2        | 22%         |
| T12          | 1        | 11%         |
| T5           | 1        | 11%         |
| <b>TOTAL</b> | <b>9</b> | <b>100%</b> |

### BMI

4 negative responses were related to High BMI and 5 responses were related to Low BMI. There does not seem to be an effect or relationship between negative feedback and BMI. The upper bound of BMI from the volunteer models that took part in the study is 40 kg/m<sup>2</sup>.



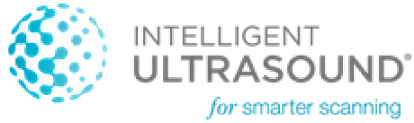**Block**

78.5% (n=7) negative responses were related to the adductor block while the remaining 2 responses related to the ESP and popliteal blocks.

The adductor block was assigned to both T2 and T3 who contributed to most of negative feedback in this questionnaire.

| <b>BLOCK</b>           | <b>NO. OF NEGATIVE COMMENTS</b> | <b>PERCENT</b> |
|------------------------|---------------------------------|----------------|
| <b>ADDUCTOR</b>        | 7                               | 77.8%          |
| <b>AXILLARY</b>        | 0                               | 0%             |
| <b>ESP</b>             | 1                               | 11.1%          |
| <b>INTERSCALENE</b>    | 0                               | 0%             |
| <b>POPLITEAL</b>       | 1                               | 11.1%          |
| <b>RECTUS SHEATH</b>   | 0                               | 0%             |
| <b>SFIC</b>            | 0                               | 0%             |
| <b>SUPRACLAVICULAR</b> | 0                               | 0%             |
| <b>SUPERIOR TRUNK</b>  | 0                               | 0%             |
| <b>TOTAL</b>           | <b>9</b>                        | <b>100%</b>    |



## 1.6 SAFETY PERFORMANCE EVALUATION BY EXPERTS (REAL-TIME USERS VS REMOTE EXPERTS)

### 1.6.1 Safety

A summary of device effect on safety and effectiveness of block is presented below:

|                                            | <i>Answer/<br/>Risk</i> | <i>Yes</i> | <i>No</i> | <i>*N/A</i> | <i>No-consensus</i> |
|--------------------------------------------|-------------------------|------------|-----------|-------------|---------------------|
| <i>PONS real-time</i>                      |                         | 5          | 62        | 36          | n/a                 |
| <i>PONS remote experts</i>                 |                         | 0          | 67        | 36          | 0                   |
| <i>Pneumothorax real-time</i>              |                         | 0          | 16        | 87          | n/a                 |
| <i>Pneumothorax remote experts</i>         |                         | 0          | 16        | 87          | 0                   |
| <i>LAST real-time</i>                      |                         | 3          | 68        | 32          | n/a                 |
| <i>LAST remote experts</i>                 |                         | 0          | 71        | 32          | 0                   |
| <i>Peritoneum violation real-time</i>      |                         | 0          | 8         | 95          | n/a                 |
| <i>Peritoneum violation remote experts</i> |                         | 0          | 8         | 95          | 0                   |
| <i>Block failure real-time</i>             |                         | 4          | 88        | 11          | n/a                 |
| <i>Block failure remote experts</i>        |                         | 8**        | 82        | 11          | 2                   |

\*Data not on data sheet returned by real-time expert or structure/complication not relevant to block

\*\*In 7/8 cases where remote experts reported increased risk of block failure, they also reported the view acquired was not adequate

#### 1.6.4 Raw data (real-time user)

The experts using ScanNav Anatomy PNB in real time (or supervising a trainee) answered the following questions:

Based on the scan just performed, does the highlighting increase the risk of:

- Nerve injury/post-operative neurological symptoms (PONS)
- Pneumothorax
- Local anaesthetic systemic toxicity
- Peritoneum violation
- Block failure

The raw data in answer to these questions are presented below:

| #  | Model BMI | Scanner ID | Scanner type | PONS | Pneumothorax | LAST | Peritoneum Violation | Block Failure | Missing |
|----|-----------|------------|--------------|------|--------------|------|----------------------|---------------|---------|
| 1  | High      | E1         | Expert       |      |              |      |                      |               | Y       |
| 2  | Low       | E1         | Expert       |      |              |      |                      |               | Y       |
| 3  | High      | T1         | Trainee      |      |              |      |                      |               | Y       |
| 4  | Low       | T1         | Trainee      |      |              |      |                      |               | Y       |
| 5  | High      | E1         | Expert       |      |              |      |                      |               | Y       |
| 6  | Low       | E1         | Expert       |      |              |      |                      |               | Y       |
| 7  | High      | T1         | Trainee      |      |              |      |                      |               | Y       |
| 8  | Low       | T1         | Trainee      |      |              |      |                      |               | Y       |
| 9  | High      | E2         | Expert       | N    | N/A          | N    | N/A                  | N             | N       |
| 10 | Low       | E2         | Expert       | N    | N/A          | N    | N/A                  | N             | N       |
| 11 | High      | T2         | Trainee      | N    | N/A          | N    | N/A                  | Y             | N       |
| 12 | Low       | T2         | Trainee      | N    | N/A          | N    | N/A                  | N             | N       |
| 13 | Low       | E2         | Expert       | N/A  | N            | N    | N/A                  | N             | N       |
| 14 | High      | E2         | Expert       | N/A  | N            | N    | N/A                  | N             | N       |
| 15 | Low       | T2         | Trainee      | N/A  | N            | N    | N/A                  | N             | N       |
| 16 | High      | T2         | Trainee      | N/A  | N            | N    | N/A                  | N             | N       |
| 17 | High      | E3         | Expert       |      |              |      |                      |               | Y       |
| 18 | Low       | E3         | Expert       |      |              |      |                      |               | Y       |
| 19 | High      | T3         | Trainee      |      |              |      |                      |               | Y       |
| 20 | Low       | T3         | Trainee      |      |              |      |                      |               | Y       |
| 21 | High      | E3         | Expert       |      |              |      |                      |               | Y       |
| 22 | Low       | E3         | Expert       |      |              |      |                      |               | Y       |
| 23 | High      | T3         | Trainee      |      |              |      |                      |               | Y       |
| 24 | Low       | T3         | Trainee      |      |              |      |                      |               | Y       |

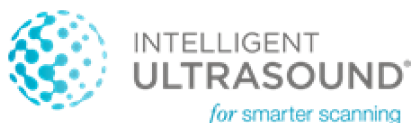

| #  | Model BMI | Scanner ID | Scanner type | PONS | Pneumothorax | LAST | Peritoneum Violation | Block Failure | Missing |
|----|-----------|------------|--------------|------|--------------|------|----------------------|---------------|---------|
| 25 | High      | E4         | Expert       | Y    | N/A          | N    | N/A                  | Y             | N       |
| 26 | Low       | E4         | Expert       | N    | N/A          | N    | N/A                  | N             | N       |
| 27 | Low       | T4         | Trainee      | Y    | N/A          | N    | N/A                  | Y             | N       |
| 28 | High      | T4         | Trainee      | Y    | N/A          | N    | N/A                  | Y             | N       |
| 29 | Low       | E4         | Expert       | N/A  | N/A          | N    | N                    | N             | N       |
| 30 | High      | E4         | Expert       | N/A  | N/A          | N    | N                    | N             | N       |
| 31 | Low       | T4         | Trainee      | N/A  | N/A          | N    | N                    | N             | N       |
| 32 | High      | T4         | Trainee      | N/A  | N/A          | N    | N                    | N             | N       |
| 33 | Low       | E5         | Expert       | N    | N/A          | N    | N/A                  | N             | N       |
| 34 | High      | E5         | Expert       | Y    | N/A          | Y    | N/A                  | N/A           | N       |
| 35 | Low       | T5         | Trainee      | N    | N/A          | Y    | N/A                  | N             | N       |
| 36 | High      | T5         | Trainee      | Y    | N/A          | Y    | N/A                  | N/A           | N       |
| 37 | Low       | E5         | Expert       | N    | N/A          | N    | N/A                  | N             | N       |
| 38 | High      | E5         | Expert       | N    | N/A          | N    | N/A                  | N             | N       |
| 39 | Low       | T5         | Trainee      | N    | N/A          | N    | N/A                  | N             | N       |
| 40 | High      | T5         | Trainee      | N    | N/A          | N    | N/A                  | N             | N       |
| 41 | High      | E6         | Expert       | N    | N/A          | N    | N/A                  | N             | N       |
| 42 | Low       | E6         | Expert       | N    | N/A          | N    | N/A                  | N             | N       |
| 43 | High      | T6         | Trainee      | N    | N/A          | N    | N/A                  | N             | N       |
| 44 | Low       | T6         | Trainee      | N    | N/A          | N    | N/A                  | N             | N       |
| 45 | Low       | E6         | Expert       | N/A  | N/A          | N    | N/A                  | N             | N       |
| 46 | High      | E6         | Expert       | N/A  | N/A          | N    | N/A                  | N             | N       |
| 47 | High      | T6         | Trainee      | N/A  | N/A          | N    | N/A                  | N             | N       |
| 48 | Low       | T6         | Trainee      | N/A  | N/A          | N    | N/A                  | N             | N       |
| 49 | High      | E7         | Expert       | N    | N/A          | N    | N/A                  | N             | N       |
| 50 | Low       | E7         | Expert       | N    | N/A          | N    | N/A                  | N             | N       |
| 51 | High      | T7         | Trainee      | N    | N/A          | N    | N/A                  | N             | N       |
| 52 | Low       | T7         | Trainee      | N    | N/A          | N    | N/A                  | N             | N       |
| 53 | High      | E7         | Expert       | N    | N            | N    | N/A                  | N             | N       |
| 54 | Low       | E7         | Expert       | N    | N            | N    | N/A                  | N             | N       |
| 55 | Low       | T7         | Trainee      | N    | N            | N    | N/A                  | N             | N       |
| 56 | High      | T7         | Trainee      | N    | N            | N    | N/A                  | N             | N       |
| 57 | Low       | E8         | Expert       | N    | N/A          | N    | N/A                  | N             | N       |
| 58 | High      | E8         | Expert       | N    | N/A          | N    | N/A                  | N             | N       |
| 59 | Low       | T8         | Trainee      | N    | N/A          | N    | N/A                  | N             | N       |
| 60 | High      | T8         | Trainee      | N    | N/A          | N    | N/A                  | N             | N       |
| 61 | High      | E8         | Expert       | N/A  | N/A          | N    | N                    | N             | N       |
| 62 | Low       | E8         | Expert       | N/A  | N/A          | N    | N                    | N             | N       |



| #   | Model BMI | Scanner ID | Scanner type | PONS | Pneumothorax | LAST | Peritoneum Violation | Block Failure | Missing |
|-----|-----------|------------|--------------|------|--------------|------|----------------------|---------------|---------|
| 63  | High      | T8         | Trainee      | N/A  | N/A          | N    | N                    | N             | N       |
| 64  | Low       | T8         | Trainee      | N/A  | N/A          | N    | N                    | N             | N       |
| 65  | High      | E9         | Expert       | N    | N/A          | N    | N/A                  | N             | N       |
| 66  | Low       | E9         | Expert       | N    | N/A          | N    | N/A                  | N             | N       |
| 67  | High      | T9         | Trainee      | N    | N/A          | N    | N/A                  | N             | N       |
| 68  | Low       | T9         | Trainee      | N    | N/A          | N    | N/A                  | N             | N       |
| 69  | Low       | E9         | Expert       | N/A  | N            | N    | N/A                  | N             | N       |
| 70  | High      | E9         | Expert       | N/A  | N            | N    | N/A                  | N             | N       |
| 71  | Low       | T9         | Trainee      | N/A  | N            | N    | N/A                  | N             | N       |
| 72  | High      | T9         | Trainee      | N/A  | N            | N    | N/A                  | N             | N       |
| 73  | High      | E10        | Expert       | N    | N/A          | N    | N/A                  | N             | N       |
| 74  | Low       | E10        | Expert       |      |              |      |                      |               | Y       |
| 75  | Low       | T10        | Trainee      | N    | N/A          | N    | N/A                  | N             | N       |
| 76  | High      | T10        | Trainee      | N    | N/A          | N    | N/A                  | N             | N       |
| 77  | High      | E10        | Expert       | N/A  | N/A          | N    | N/A                  | N             | N       |
| 78  | Low       | E10        | Expert       | N/A  | N/A          | N    | N/A                  | N             | N       |
| 79  | High      | T10        | Trainee      | N/A  | N/A          | N    | N/A                  | N             | N       |
| 80  | Low       | T10        | Trainee      | N/A  | N/A          | N    | N/A                  | N             | N       |
| 81  | Low       | E11        | Expert       | N    | N/A          | N    | N/A                  | N             | N       |
| 82  | High      | E11        | Expert       | N    | N/A          | N    | N/A                  | N             | N       |
| 83  | Low       | T11        | Trainee      | N    | N/A          | N    | N/A                  | N             | N       |
| 84  | High      | T11        | Trainee      | N    | N/A          | N    | N/A                  | N             | N       |
| 85  | Low       | E11        | Expert       | N/A  | N/A          | N    | N/A                  | N             | N       |
| 86  | High      | E11        | Expert       | N/A  | N/A          | N    | N/A                  | N             | N       |
| 87  | Low       | T11        | Trainee      | N/A  | N/A          | N    | N/A                  | N             | N       |
| 88  | High      | T11        | Trainee      | N/A  | N/A          | N    | N/A                  | N             | N       |
| 89  | High      | E12        | Expert       | N/A  | N            | N    | N/A                  | N             | N       |
| 90  | Low       | E12        | Expert       | N/A  | N            | N    | N/A                  | N             | N       |
| 91  | High      | T12        | Trainee      | N/A  | N            | N    | N/A                  | N             | N       |
| 92  | Low       | T12        | Trainee      | N/A  | N            | N    | N/A                  | N             | N       |
| 93  | High      | E12        | Expert       | N    | N/A          | N    | N/A                  | N             | N       |
| 94  | Low       | E12        | Expert       | N    | N/A          | N    | N/A                  | N             | N       |
| 95  | High      | T12        | Trainee      | N    | N/A          | N    | N/A                  | N             | N       |
| 96  | Low       | T12        | Trainee      | N    | N/A          | N    | N/A                  | N             | N       |
| 97  | Low       | E13        | Expert       | N    | N/A          | N    | N/A                  | N             | N       |
| 98  | High      | E13        | Expert       | N    | N/A          | N    | N/A                  | N/A           | N       |
| 99  | High      | T13        | Trainee      | N    | N/A          | N    | N/A                  | N             | N       |
| 100 | Low       | T13        | Trainee      | N    | N/A          | N    | N/A                  | N             | N       |



| #   | Model BMI | Scanner ID | Scanner type | PONS | Pneumothorax | LAST | Peritoneum Violation | Block Failure | Missing |
|-----|-----------|------------|--------------|------|--------------|------|----------------------|---------------|---------|
| 101 | Low       | E13        | Expert       | N/A  | N/A          | N    | N/A                  | N             | N       |
| 102 | High      | E13        | Expert       | N/A  | N/A          | N    | N/A                  | N             | N       |
| 103 | Low       | T13        | Trainee      | N/A  | N/A          | N    | N/A                  | N             | N       |
| 104 | High      | T13        | Trainee      | N/A  | N/A          | N    | N/A                  | N             | N       |
| 105 | Low       | E14        | Expert       | N    | N/A          | N    | N/A                  | N             | N       |
| 106 | High      | E14        | Expert       | N    | N/A          | N    | N/A                  | N             | N       |
| 107 | Low       | T14        | Trainee      | N    | N/A          | N    | N/A                  | N             | N       |
| 108 | High      | T14        | Trainee      | N    | N/A          | N    | N/A                  | N             | N       |
| 109 | High      | E14        | Expert       | N    | N/A          | N    | N/A                  | N             | N       |
| 110 | Low       | E14        | Expert       | N    | N/A          | N    | N/A                  | N             | N       |
| 111 | High      | T14        | Trainee      | N    | N/A          | N    | N/A                  | N             | N       |
| 112 | Low       | T14        | Trainee      | N    | N/A          | N    | N/A                  | N             | N       |
| 113 | Low       | E15        | Expert       | N    | N/A          | N    | N/A                  | N/A           | N       |
| 114 | High      | E15        | Expert       | N    | N/A          | N    | N/A                  | N/A           | N       |
| 115 | Low       | T15        | Trainee      | N    | N/A          | N    | N/A                  | N/A           | N       |
| 116 | High      | T15        | Trainee      | N    | N/A          | N    | N/A                  | N/A           | N       |
| 117 | Low       | E15        | Expert       | N    | N/A          | N    | N/A                  | N/A           | N       |
| 118 | High      | E15        | Expert       | N    | N/A          | N    | N/A                  | N/A           | N       |
| 119 | Low       | T15        | Trainee      | N    | N/A          | N    | N/A                  | N/A           | N       |
| 120 | High      | T15        | Trainee      | N    | N/A          | N    | N/A                  | N/A           | N       |

### Specific adverse events

#### PONS

An assessment whether highlighting increases a risk of PONS was made for total of 67 scans, over six block regions (adductor, axillary, interscalene, popliteal, supraclavicular and superior trunk):

| Risk of PONS | Number of scans | Rate   |
|--------------|-----------------|--------|
| No           | 62              | 0.925  |
| Yes          | 5               | 0.0746 |
| <b>Total</b> | <b>67</b>       |        |

| Scan ID | Block | BMI  | Scanner type | Scanner ID | Risk of PONS |
|---------|-------|------|--------------|------------|--------------|
| 25      | Add   | High | Expert       | E4         | Yes          |
| 27      | Add   | Low  | Trainee      | T4         | Yes          |
| 28      | Add   | High | Trainee      | T4         | Yes          |
| 34      | Ax    | High | Expert       | E5         | Yes          |
| 36      | Ax    | High | Trainee      | T5         | Yes          |

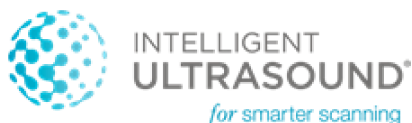**LAST**

An assessment whether highlighting increases a risk of LAST was made for total of 103 scans, over all 9 supported blocks.

| Risk of LAST | Number of scans | Rate  |
|--------------|-----------------|-------|
| No           | 68              | 0.958 |
| Yes          | 3               | 0.042 |
| <b>Total</b> | <b>103</b>      |       |

| Scan ID | Block | BMI  | Scanner type | Scanner ID | Risk of LAST |
|---------|-------|------|--------------|------------|--------------|
| 34      | Ax    | High | Expert       | E5         | Yes          |
| 35      | Ax    | Low  | Trainee      | T5         | Yes          |
| 36      | Ax    | High | Trainee      | T5         | Yes          |

**BLOCK FAILURE**

An assessment was made for total of 92 scans, over all 9 supported blocks.

| Risk of Block Failure | Number of scans | Rate  |
|-----------------------|-----------------|-------|
| No                    | 88              | 0.956 |
| Yes                   | 4               | 0.043 |
| Not applicable        | 11              | n/a   |
| <b>Total</b>          | <b>103</b>      |       |

| Scan ID | Block | US machine      | BMI  | Scanner type | Scanner ID | Nerve | Artery | Risk of Block failure |
|---------|-------|-----------------|------|--------------|------------|-------|--------|-----------------------|
| 11      | Add   | SonoSite PX     | High | Trainee      | T2         | FP    | TP     | Yes                   |
| 25      | Add   | SonoSite PX     | High | Expert       | E4         | FP    | TP     | Yes                   |
| 27      | Add   | SonoSite Xporte | Low  | Trainee      | T4         | FP    | TP     | Yes                   |
| 28      | Add   | SonoSite PX     | High | Trainee      | T4         | FP    | TP     | Yes                   |



### 1.6.5 Raw Data (Remote Expert)

A panel of 3 independent experts viewed the ultrasound videos remotely (with unmodified and highlighted videos presented one above the other), to score the 103 scans collected with ScanNav Anatomy PNB during this study (for which real-time data was available). The experts scored clips independently and were unaware of each other's answers. The majority view of the experts was established afterwards to arrive to a single majority decision.

The majority views of the experts are presented below. In some instances, it was not possible to arrive to a majority decision, so those instances are marked as "undetermined" and were excluded from analysis. Entries marked as "N/A" represent entries that are not applicable for the assigned block (e.g., accuracy scores for the Peritoneum are marked as "N/A" for the Popliteal block, as there is no possibility of encountering the peritoneum in this location).



| Scan ID | block | BMI category | Scanner ID | Scanner type | Majority view |              |      |                      |               |
|---------|-------|--------------|------------|--------------|---------------|--------------|------|----------------------|---------------|
|         |       |              |            |              | PONS          | Pneumothorax | LAST | Peritoneum violation | Block failure |
| 1       | POP   | High         | E01        | Expert       |               |              |      |                      |               |
| 2       | POP   | Low          | E01        | Expert       |               |              |      |                      |               |
| 3       | POP   | High         | T01        | Trainee      |               |              |      |                      |               |
| 4       | POP   | Low          | T01        | Trainee      |               |              |      |                      |               |
| 5       | RS    | High         | E01        | Expert       |               |              |      |                      |               |
| 6       | RS    | Low          | E01        | Expert       |               |              |      |                      |               |
| 7       | RS    | High         | T01        | Trainee      |               |              |      |                      |               |
| 8       | RS    | Low          | T01        | Trainee      |               |              |      |                      |               |
| 9       | ADD   | High         | E02        | Expert       | N             | #N/A         | N    | #N/A                 | N             |
| 10      | ADD   | Low          | E02        | Expert       | N             | #N/A         | N    | #N/A                 | N             |
| 11      | ADD   | High         | T02        | Trainee      | N             | #N/A         | N    | #N/A                 | N             |
| 12      | ADD   | Low          | T02        | Trainee      | N             | #N/A         | N    | #N/A                 | N             |
| 13      | ESP   | Low          | E02        | Expert       | #N/A          | N            | N    | #N/A                 | Y             |
| 14      | ESP   | High         | E02        | Expert       | #N/A          | N            | N    | #N/A                 | N             |
| 15      | ESP   | Low          | T02        | Trainee      | #N/A          | N            | N    | #N/A                 | undetermined  |
| 16      | ESP   | High         | T02        | Trainee      | #N/A          | N            | N    | #N/A                 | N             |
| 17      | ADD   | High         | E03        | Expert       |               |              |      |                      |               |
| 18      | ADD   | Low          | E03        | Expert       |               |              |      |                      |               |
| 19      | ADD   | High         | T03        | Trainee      |               |              |      |                      |               |
| 20      | ADD   | Low          | T03        | Trainee      |               |              |      |                      |               |
| 21      | ST    | High         | E03        | Expert       |               |              |      |                      |               |
| 22      | ST    | Low          | E03        | Expert       |               |              |      |                      |               |
| 23      | ST    | High         | T03        | Trainee      |               |              |      |                      |               |
| 24      | ST    | Low          | T03        | Trainee      |               |              |      |                      |               |

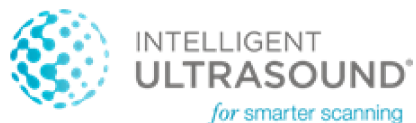

| Scan ID | block | BMI category | Scanner ID | Scanner type | Majority view |              |      |                      |               |
|---------|-------|--------------|------------|--------------|---------------|--------------|------|----------------------|---------------|
|         |       |              |            |              | PONS          | Pneumothorax | LAST | Peritoneum violation | Block failure |
| 25      | ADD   | High         | E04        | Expert       | N             | #N/A         | N    | #N/A                 | N             |
| 26      | ADD   | Low          | E04        | Expert       | N             | #N/A         | N    | #N/A                 | N             |
| 27      | ADD   | Low          | T04        | Trainee      | N             | #N/A         | N    | #N/A                 | N             |
| 28      | ADD   | High         | T04        | Trainee      | N             | #N/A         | N    | #N/A                 | N             |
| 29      | RS    | Low          | E04        | Expert       | N             | #N/A         | N    | N                    | N             |
| 30      | RS    | High         | E04        | Expert       | N             | #N/A         | N    | N                    | N             |
| 31      | RS    | Low          | T04        | Trainee      | N             | #N/A         | N    | N                    | N             |
| 32      | RS    | High         | T04        | Trainee      | N             | #N/A         | N    | N                    | N             |
| 33      | AX    | Low          | E05        | Expert       | N             | #N/A         | N    | #N/A                 | N             |
| 34      | AX    | High         | E05        | Expert       | N             | #N/A         | N    | #N/A                 | N             |
| 35      | AX    | Low          | T05        | Trainee      | N             | #N/A         | N    | #N/A                 | N             |
| 36      | AX    | High         | T05        | Trainee      | N             | #N/A         | N    | #N/A                 | N             |
| 37      | POP   | Low          | E05        | Expert       | N             | #N/A         | N    | #N/A                 | N             |
| 38      | POP   | High         | E05        | Expert       | N             | #N/A         | N    | #N/A                 | N             |
| 39      | POP   | Low          | T05        | Trainee      | N             | #N/A         | N    | #N/A                 | Y             |
| 40      | POP   | High         | T05        | Trainee      | N             | #N/A         | N    | #N/A                 | N             |
| 41      | POP   | High         | E06        | Expert       | N             | #N/A         | N    | #N/A                 | N             |
| 42      | POP   | Low          | E06        | Expert       | N             | #N/A         | N    | #N/A                 | N             |
| 43      | POP   | High         | T06        | Trainee      | N             | #N/A         | N    | #N/A                 | N             |
| 44      | POP   | Low          | T06        | Trainee      | N             | #N/A         | N    | #N/A                 | N             |
| 45      | SFIC  | Low          | E06        | Expert       | N             | #N/A         | N    | #N/A                 | undetermined  |
| 46      | SFIC  | High         | E06        | Expert       | N             | #N/A         | N    | #N/A                 | N             |
| 47      | SFIC  | High         | T06        | Trainee      | N             | #N/A         | N    | #N/A                 | N             |
| 48      | SFIC  | Low          | T06        | Trainee      | N             | #N/A         | N    | #N/A                 | Y             |
| 49      | POP   | High         | E07        | Expert       | N             | #N/A         | N    | #N/A                 | N             |
| 50      | POP   | Low          | E07        | Expert       | N             | #N/A         | N    | #N/A                 | N             |
| 51      | POP   | High         | T07        | Trainee      | N             | #N/A         | N    | #N/A                 | N             |

AG-D-FDADUBR-073  
Device use and benefit report

Rev A

30 of 34



| Scan ID | block | BMI category | Scanner ID | Scanner type | Majority view |              |              |                      |               |
|---------|-------|--------------|------------|--------------|---------------|--------------|--------------|----------------------|---------------|
|         |       |              |            |              | PONS          | Pneumothorax | LAST         | Peritoneum violation | Block failure |
| 52      | POP   | Low          | T07        | Trainee      | N             | #N/A         | N            | #N/A                 | N             |
| 53      | SC    | High         | E07        | Expert       | N             | N            | N            | #N/A                 | N             |
| 54      | SC    | Low          | E07        | Expert       | N             | N            | N            | #N/A                 | N             |
| 55      | SC    | Low          | T07        | Trainee      | N             | N            | N            | #N/A                 | N             |
| 56      | SC    | High         | T07        | Trainee      | N             | N            | N            | #N/A                 | N             |
| 57      | IS    | Low          | E08        | Expert       | N             | N            | N            | #N/A                 | N             |
| 58      | IS    | High         | E08        | Expert       | N             | N            | N            | #N/A                 | N             |
| 59      | IS    | Low          | T08        | Trainee      | N             | N            | N            | #N/A                 | N             |
| 60      | IS    | High         | T08        | Trainee      | N             | N            | N            | #N/A                 | N             |
| 61      | RS    | High         | E08        | Expert       | N             | #N/A         | N            | N                    | N             |
| 62      | RS    | Low          | E08        | Expert       | N             | #N/A         | N            | N                    | N             |
| 63      | RS    | High         | T08        | Trainee      | N             | #N/A         | N            | N                    | N             |
| 64      | RS    | Low          | T08        | Trainee      | N             | #N/A         | N            | N                    | N             |
| 65      | AX    | High         | E09        | Expert       | N             | #N/A         | N            | #N/A                 | N             |
| 66      | AX    | Low          | E09        | Expert       | N             | #N/A         | N            | #N/A                 | N             |
| 67      | AX    | High         | T09        | Trainee      | N             | #N/A         | N            | #N/A                 | N             |
| 68      | AX    | Low          | T09        | Trainee      | N             | #N/A         | N            | #N/A                 | N             |
| 69      | ESP   | Low          | E09        | Expert       | #N/A          | N            | N            | #N/A                 | N             |
| 70      | ESP   | High         | E09        | Expert       | #N/A          | N            | N            | #N/A                 | Y             |
| 71      | ESP   | Low          | T09        | Trainee      | #N/A          | N            | N            | #N/A                 | N             |
| 72      | ESP   | High         | T09        | Trainee      | #N/A          | N            | undetermined | #N/A                 | Y             |
| 73      | POP   | High         | E10        | Expert       | N             | #N/A         | N            | #N/A                 | N             |
| 74      | POP   | Low          | E10        | Expert       |               |              |              |                      |               |
| 75      | POP   | Low          | T10        | Trainee      | N             | #N/A         | N            | #N/A                 | N             |
| 76      | POP   | High         | T10        | Trainee      | N             | #N/A         | N            | #N/A                 | N             |
| 77      | SFIC  | High         | E10        | Expert       | N             | #N/A         | N            | #N/A                 | N             |
| 78      | SFIC  | Low          | E10        | Expert       | N             | #N/A         | N            | #N/A                 | N             |

AG-D-FDADUBR-073  
Device use and benefit report

Rev A

31 of 34



| Scan ID | block | BMI category | Scanner ID | Scanner type | Majority view |              |      |                      |               |
|---------|-------|--------------|------------|--------------|---------------|--------------|------|----------------------|---------------|
|         |       |              |            |              | PONS          | Pneumothorax | LAST | Peritoneum violation | Block failure |
| 79      | SFIC  | High         | T10        | Trainee      | N             | #N/A         | N    | #N/A                 | N             |
| 80      | SFIC  | Low          | T10        | Trainee      | N             | #N/A         | N    | #N/A                 | N             |
| 81      | ADD   | Low          | E11        | Expert       | N             | #N/A         | N    | #N/A                 | N             |
| 82      | ADD   | High         | E11        | Expert       | N             | #N/A         | N    | #N/A                 | N             |
| 83      | ADD   | Low          | T11        | Trainee      | N             | #N/A         | N    | #N/A                 | N             |
| 84      | ADD   | High         | T11        | Trainee      | N             | #N/A         | N    | #N/A                 | N             |
| 85      | SFIC  | Low          | E11        | Expert       | N             | #N/A         | N    | #N/A                 | Y             |
| 86      | SFIC  | High         | E11        | Expert       | N             | #N/A         | N    | #N/A                 | N             |
| 87      | SFIC  | Low          | T11        | Trainee      | N             | #N/A         | N    | #N/A                 | N             |
| 88      | SFIC  | High         | T11        | Trainee      | N             | #N/A         | N    | #N/A                 | N             |
| 89      | ESP   | High         | E12        | Expert       | #N/A          | N            | N    | #N/A                 | Y             |
| 90      | ESP   | Low          | E12        | Expert       | #N/A          | N            | N    | #N/A                 | N             |
| 91      | ESP   | High         | T12        | Trainee      | #N/A          | N            | N    | #N/A                 | Y             |
| 92      | ESP   | Low          | T12        | Trainee      | #N/A          | N            | N    | #N/A                 | N             |
| 93      | POP   | High         | E12        | Expert       | N             | #N/A         | N    | #N/A                 | N             |
| 94      | POP   | Low          | E12        | Expert       | N             | #N/A         | N    | #N/A                 | N             |
| 95      | POP   | High         | T12        | Trainee      | N             | #N/A         | N    | #N/A                 | N             |
| 96      | POP   | Low          | T12        | Trainee      | N             | #N/A         | N    | #N/A                 | N             |
| 97      | ADD   | Low          | E13        | Expert       | N             | #N/A         | N    | #N/A                 | N             |
| 98      | ADD   | High         | E13        | Expert       | N             | #N/A         | N    | #N/A                 | N             |
| 99      | ADD   | High         | T13        | Trainee      | N             | #N/A         | N    | #N/A                 | N             |
| 100     | ADD   | Low          | T13        | Trainee      | N             | #N/A         | N    | #N/A                 | N             |
| 101     | SFIC  | Low          | E13        | Expert       | N             | #N/A         | N    | #N/A                 | N             |
| 102     | SFIC  | High         | E13        | Expert       | N             | #N/A         | N    | #N/A                 | N             |
| 103     | SFIC  | Low          | T13        | Trainee      | N             | #N/A         | N    | #N/A                 | N             |
| 104     | SFIC  | High         | T13        | Trainee      | N             | #N/A         | N    | #N/A                 | N             |
| 105     | IS    | Low          | E14        | Expert       | N             | N            | N    | #N/A                 | N             |

AG-D-FDADUBR-073  
Device use and benefit report

Rev A

32 of 34



| Scan ID | block | BMI category | Scanner ID | Scanner type | Majority view |              |      |                      |               |
|---------|-------|--------------|------------|--------------|---------------|--------------|------|----------------------|---------------|
|         |       |              |            |              | PONS          | Pneumothorax | LAST | Peritoneum violation | Block failure |
| 106     | IS    | High         | E14        | Expert       | N             | N            | N    | #N/A                 | N             |
| 107     | IS    | Low          | T14        | Trainee      | N             | N            | N    | #N/A                 | N             |
| 108     | IS    | High         | T14        | Trainee      | N             | N            | N    | #N/A                 | N             |
| 109     | POP   | High         | E14        | Expert       | N             | #N/A         | N    | #N/A                 | N             |
| 110     | POP   | Low          | E14        | Expert       | N             | #N/A         | N    | #N/A                 | N             |
| 111     | POP   | High         | T14        | Trainee      | N             | #N/A         | N    | #N/A                 | N             |
| 112     | POP   | Low          | T14        | Trainee      | N             | #N/A         | N    | #N/A                 | N             |
| 113     | ADD   | Low          | E15        | Expert       | N             | #N/A         | N    | #N/A                 | N             |
| 114     | ADD   | High         | E15        | Expert       | N             | #N/A         | N    | #N/A                 | N             |
| 115     | ADD   | Low          | T15        | Trainee      | N             | #N/A         | N    | #N/A                 | N             |
| 116     | ADD   | High         | T15        | Trainee      | N             | #N/A         | N    | #N/A                 | N             |
| 117     | ST    | Low          | E15        | Expert       | N             | N            | N    | #N/A                 | N             |
| 118     | ST    | High         | E15        | Expert       | N             | N            | N    | #N/A                 | N             |
| 119     | ST    | Low          | T15        | Trainee      | N             | N            | N    | #N/A                 | N             |
| 120     | ST    | High         | T15        | Trainee      | N             | N            | N    | #N/A                 | N             |

**Specific adverse events****BLOCK FAILURE**

An assessment was made for total of 92 scans (11 of the 103 returned data sets incomplete), over all 9 supported blocks.

| Risk of Block Failure | Number of scans | Rate  |
|-----------------------|-----------------|-------|
| No                    | 82              | 0.919 |
| Yes                   | 8               | 0.087 |
| undetermined          | 2               | 0.021 |
| <b>Total</b>          | <b>92</b>       |       |

| Scan ID | Block | BMI  | Scanner type | Scanner ID | Correct view             | Risk of Block failure | Nerve | Artery       | Pleura       |
|---------|-------|------|--------------|------------|--------------------------|-----------------------|-------|--------------|--------------|
| 13      | ESP   | Low  | Expert       | E02        | No, incorrect gain       | Y                     | n/a   | n/a          | TP           |
| 15      | ESP   | Low  | Trainee      | T02        | No, incorrect structures | undetermined          | n/a   | n/a          | TP           |
| 39      | POP   | Low  | Trainee      | T05        | Y                        | Y                     | FP    | TP           | n/a          |
| 45      | SFIC  | Low  | Expert       | E06        | No, incorrect structures | undetermined          | n/a   | undetermined | n/a          |
| 48      | SFIC  | Low  | Trainee      | T06        | No, incorrect structures | Y                     | n/a   | undetermined | n/a          |
| 70      | ESP   | High | Expert       | E09        | undetermined             | Y                     | n/a   | n/a          | TP           |
| 72      | ESP   | High | Trainee      | T09        | undetermined             | Y                     | n/a   | n/a          | TP           |
| 85      | SFIC  | Low  | Expert       | E11        | No, incorrect structures | Y                     | n/a   | TN           | n/a          |
| 89      | ESP   | High | Expert       | E12        | undetermined             | Y                     | n/a   | n/a          | undetermined |
| 91      | ESP   | High | Trainee      | T12        | No, artifact             | Y                     | n/a   | n/a          | TN           |
